# Supplementary material for: Arapaima gigas maintains gas exchange separation in severe aquatic hypoxia but does not suffer branchial oxygen loss
Source: Oxford University Press journal article supplement (doi:10.1242/jeb.243672), 2022-02-08
Supplement: jeb243672supp.pdf [file jeb243672supp.pdf]

**Fig. S1. Accuracy and repeatability of the artificial lung**

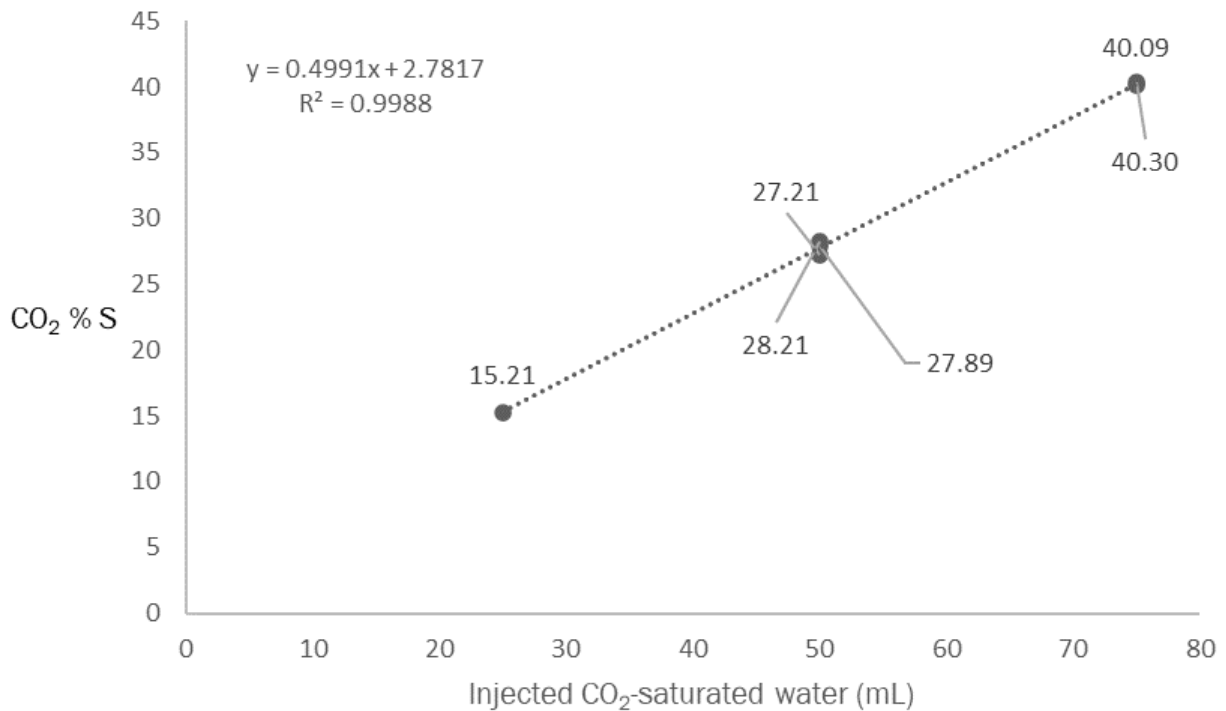

Six CO<sub>2</sub>-saturated water injections were made and measured in the order 50, 50, 25, 75, 75 and 50 ml.

Fig. S1 shows a pilot calibration test where eight injections were measured based on three different volumes of CO<sub>2</sub> injected (25 ml, 50 ml, and 75 ml (755, 1510 and 2265  $\mu\text{mol CO}_2$ )), based on the method described in the CO<sub>2</sub> water measurement section (2.3.3). This validation of the apparatus shows the accurate repeatability and linearity of the system. A linear slope indicates that the calibration factor does not differ when different CO<sub>2</sub> concentrations are measured, which means that a single injection after each replicate is enough to accurately calibrate the system even when the fish varies in amount of CO<sub>2</sub> excreted during the measurement (e.g., high stress values vs low relaxed values). The accurate repeatability of the system is indicated by the overlapping measurements. The chamber had been flushed twice before injections to equilibrate the system.

Fig. S2. Ammonia and Urea baseline increase

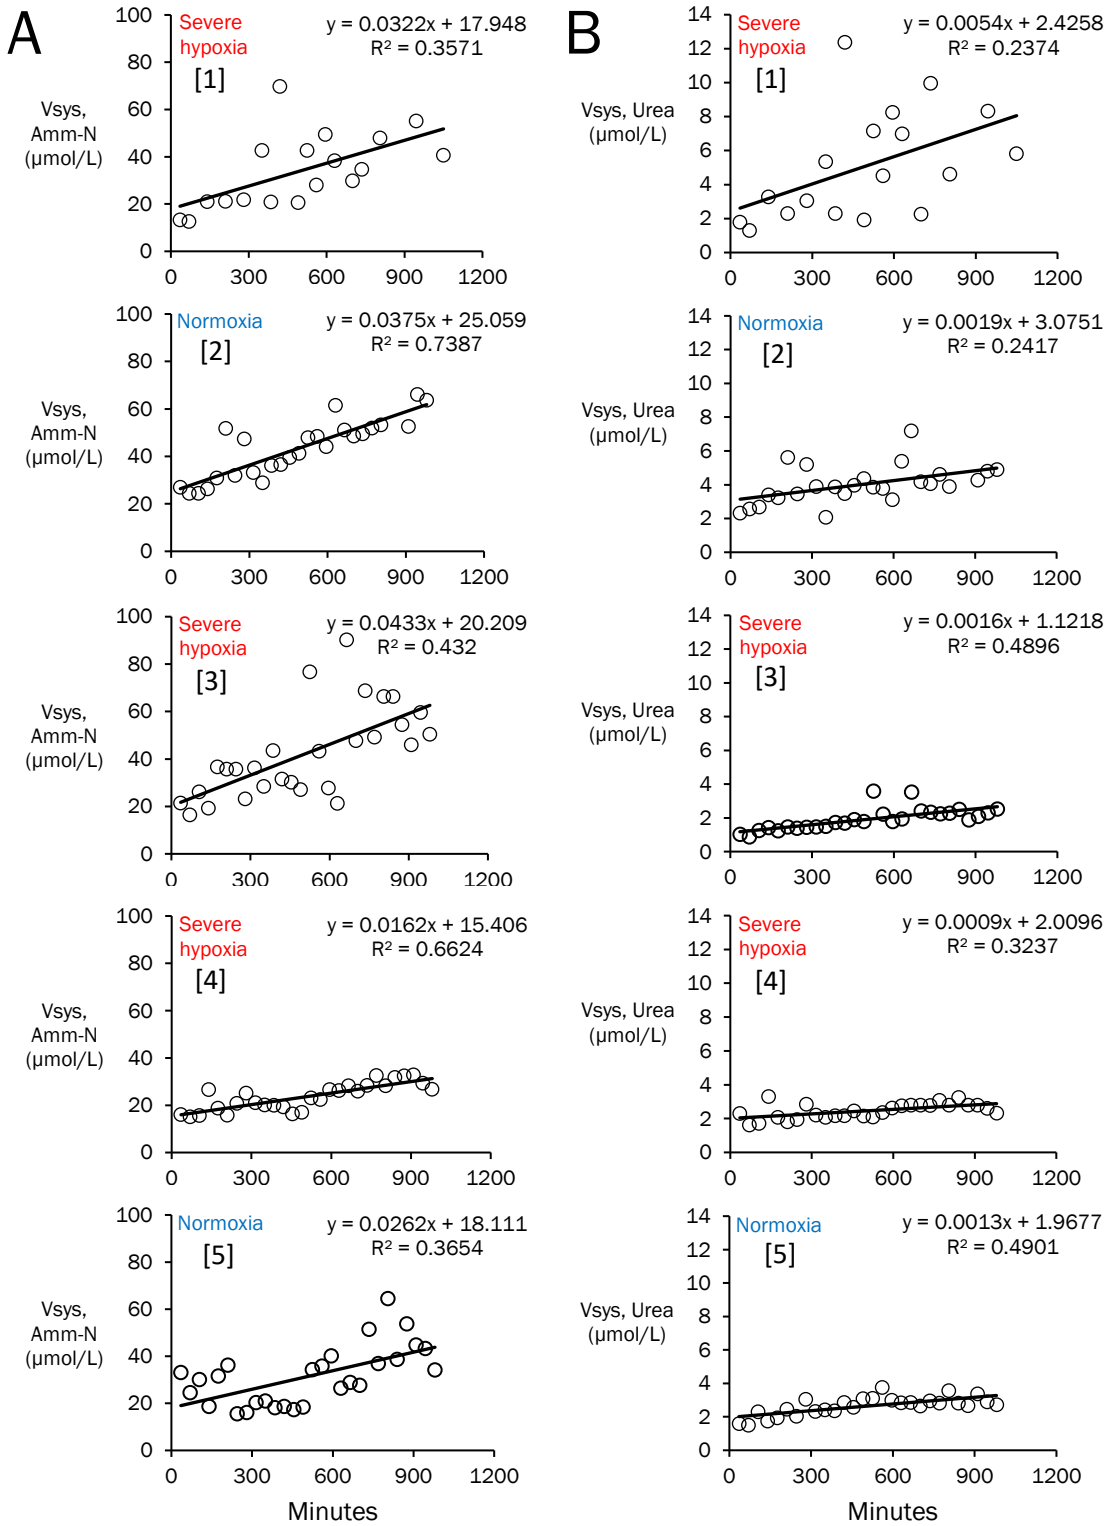

These plots show the concentration increase of total Ammonia-N (A) and Urea-N (B) in the whole system water volume (~240 L) for *Arapaima gigas* (n=5). Water treatment is shown by 'Normoxia' and 'Severe hypoxia'. Individual experiments are displayed with unique bracketed [ ] numbers.

We could not reliably measure the elevations of the concentrations of the N-wastes inside the chamber during each closed period. We instead considered the water samples made at the beginning of each closed period (note: just after flushing the chamber with header-tank water) as being a sample from the entire system's water volume (chamber + header-tank). Thus, we calculated an average excretion rate for the entire measurement period (~17.5h) by performing a linear regression on the system's concentration increase of both ammonia-N and urea-N (Fig. S2).
